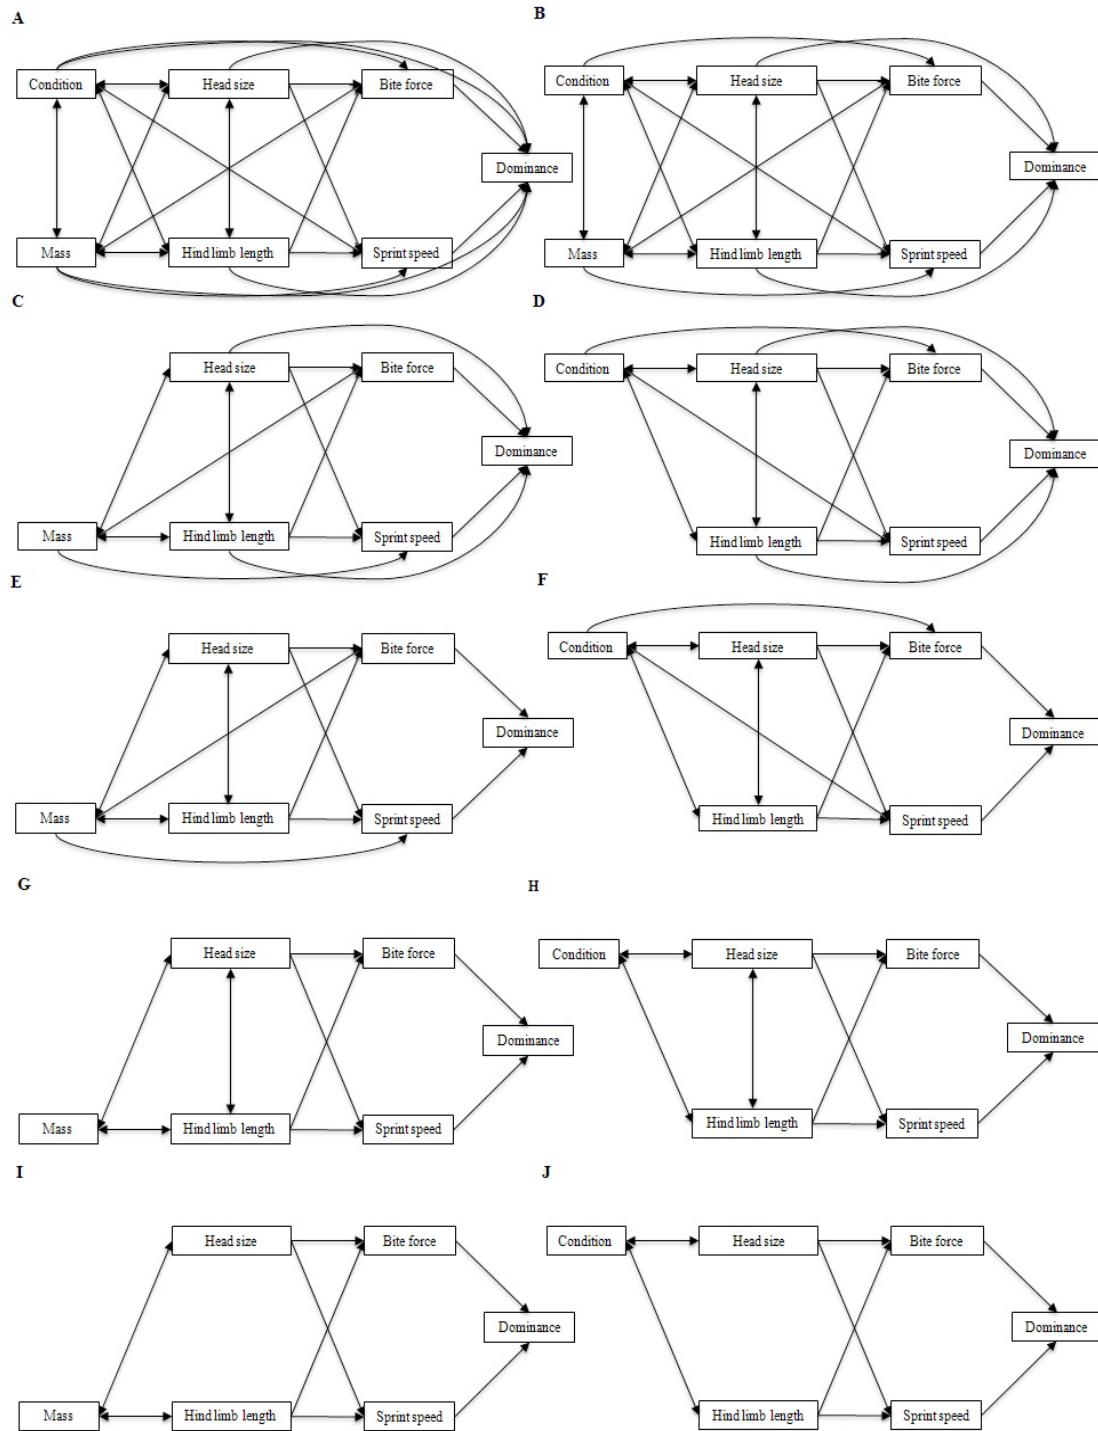

**Fig. S1.** The ten path models (A–J) depicting the relationships among morphological and performance traits with dominance for male *Hemidactylus frenatus*. The same path models were used for examining the relationships among morphology, performance and prey capture (substituting prey capture measurements for dominance).

**Table S1.** Path model output for the dominance trials comparing all 10 models that describe the relationships among morphological and performance traits with dominance in male *Hemidactylus frenatus*. Where  $\chi^2$  = Chi square goodness of fit, df = degrees of freedom,  $K$  = number of parameters, AIC<sub>C</sub> = the Akaike information criterion,  $w_i$  = the Akaike weight and *Rank* = ranking order for all 10 models. Model I is more than 35% likely to be the best predictor of the relationship among morphological and performance traits and dominance.

| <b>Model</b>               | <b><math>\chi^2</math></b> | <b>d.f.</b> | <b><math>K</math></b> | <b>AIC<sub>C</sub></b> | <b><math>w_i</math></b> | <b><i>Rank</i></b> |
|----------------------------|----------------------------|-------------|-----------------------|------------------------|-------------------------|--------------------|
| Model A (Fig. S1-A)        | 0.2                        | 1           | 34                    | 484.1                  | 0.000                   | 10                 |
| Model B (Fig. S1-B)        | 2.7                        | 3           | 32                    | 308.4                  | 0.000                   | 9                  |
| Model E (Fig. S1-C)        | 1.1                        | 2           | 25                    | 84.0                   | 0.000                   | 8                  |
| Model F (Fig. S1-D)        | 0.8                        | 2           | 25                    | 83.6                   | 0.000                   | 7                  |
| Model C (Fig. S1-E)        | 1.2                        | 4           | 23                    | 56.2                   | 0.021                   | 5                  |
| Model D (Fig. S1-F)        | 1.5                        | 4           | 23                    | 56.5                   | 0.017                   | 6                  |
| Model G (Fig. S1-G)        | 17.9                       | 6           | 21                    | 51.2                   | 0.256                   | 2                  |
| Model H (Fig. S1-H)        | 18.7                       | 6           | 21                    | 52.1                   | 0.167                   | 4                  |
| <b>Model I (Fig. S1-I)</b> | <b>26.51</b>               | <b>7</b>    | <b>20</b>             | <b>50.7</b>            | <b>0.325</b>            | <b>1</b>           |
| Model J (Fig. S1-J)        | 27.4                       | 7           | 20                    | 51.6                   | 0.212                   | 3                  |

**Table S2.** Path model output for prey capture trials comparing all 10 models that describe the relationships among morphological and performance traits with prey capture (*represented by dominance in graphical model – see Fig. S1*) in male *Hemidactylus frenatus*. Where  $\chi^2$  = Chi square goodness of fit, df = degrees of freedom,  $K$  = number of parameters,  $AIC_C$  = the Akaike information criterion,  $w_i$  = the Akaike weight and *Rank* = ranking order for all 10 models. Model G is more than 60% likely to be the best predictor of the relationship among morphological and performance traits and prey capture.

| <b>Model</b>               | <b><math>\chi^2</math></b> | <b>d.f.</b> | <b><math>K</math></b> | <b><math>AIC_C</math></b> | <b><math>w_i</math></b> | <b><i>Rank</i></b> |
|----------------------------|----------------------------|-------------|-----------------------|---------------------------|-------------------------|--------------------|
| Model A (Fig. S1-A)        | 0.4                        | 1           | 35                    | 640.4                     | 0.000                   | 10                 |
| Model B (Fig. S1-B)        | 2.0                        | 3           | 32                    | 307.7                     | 0.000                   | 9                  |
| Model E (Fig. S1-C)        | 1.1                        | 2           | 25                    | 84.0                      | 0.000                   | 7                  |
| Model F (Fig. S1-D)        | 1.7                        | 2           | 25                    | 84.6                      | 0.000                   | 8                  |
| Model C (Fig. S1-E)        | 2.5                        | 4           | 23                    | 57.5                      | 0.000                   | 6                  |
| Model D (Fig. S1-F)        | 3.1                        | 4           | 23                    | 58.1                      | 0.000                   | 5                  |
| <b>Model G (Fig. S1-G)</b> | <b>5.2</b>                 | <b>6</b>    | <b>21</b>             | <b>38.6</b>               | <b>0.600</b>            | <b>1</b>           |
| Model H (Fig. S1-H)        | 6.4                        | 6           | 21                    | 39.7                      | 0.345                   | 2                  |
| Model I (Fig. S1-I)        | 21.3                       | 7           | 20                    | 45.5                      | 0.019                   | 4                  |
| Model J (Fig. S1-J)        | 20.2                       | 7           | 20                    | 44.4                      | 0.033                   | 3                  |
